# Supplementary material
Source: HighWire-hosted journal article supplement (https://cmaj.ca/highwire/filestream/60033/field_highwire_adjunct_files/1/160126-res-2-at.pdf)
Supplement: 160126-res-2-at.pdf [file 160126-res-2-at.pdf]

**Appendix 2 (as supplied by the authors): Risk of pneumonia in terms of benzodiazepine and related drug substances and dose among those who initiated with only one drug (N =8,383 and 119 users initiating two benzodiazepines concomitantly were excluded, N = 8,382)**

| <b>Drug</b>                                                                                                                                                                                                                                                                                                                                  | <b>Number of users in monotherapy</b> | <b>Number of pneumonia events</b> | <b>Unadjusted HR (95% CI)</b> |
|----------------------------------------------------------------------------------------------------------------------------------------------------------------------------------------------------------------------------------------------------------------------------------------------------------------------------------------------|---------------------------------------|-----------------------------------|-------------------------------|
| <b>Drug substance specific comparisons<sup>a)</sup></b>                                                                                                                                                                                                                                                                                      |                                       |                                   |                               |
| <b>Diazepam</b>                                                                                                                                                                                                                                                                                                                              | 236                                   | 6                                 | 1.50 (0.42-5.32)              |
| <b>Chlordiazepoxide</b>                                                                                                                                                                                                                                                                                                                      | 28                                    | 0                                 |                               |
| <b>Oxazepam</b>                                                                                                                                                                                                                                                                                                                              | 2568                                  | 154                               | 1.59 (1.20-2.09)              |
| <b>Lorazepam</b>                                                                                                                                                                                                                                                                                                                             | 714                                   | 48                                | 1.31 (0.81-2.13)              |
| <b>Alprazolam</b>                                                                                                                                                                                                                                                                                                                            | 105                                   | 5                                 | 0.57 (0.17-1.95)              |
| <b>Nitrazepam</b>                                                                                                                                                                                                                                                                                                                            | 29                                    | 1                                 |                               |
| <b>Temazepam</b>                                                                                                                                                                                                                                                                                                                             | 1433                                  | 87                                | 1.12 (0.79-1.60)              |
| <b>Zopiclone</b>                                                                                                                                                                                                                                                                                                                             | 2876                                  | 130                               | 1.04 (0.79-1.39)              |
| <b>Zolpidem</b>                                                                                                                                                                                                                                                                                                                              | 393                                   | 8                                 | 1.00 (0.35-2.85)              |
| <b>Dose category comparisons</b>                                                                                                                                                                                                                                                                                                             |                                       |                                   |                               |
| <b>Lower dose (&lt;1.1 DDDs)</b>                                                                                                                                                                                                                                                                                                             | 7936                                  | 405                               | 1.18 (1.01-1.39)              |
| <b>Higher dose (≥1.1 DDDs)</b>                                                                                                                                                                                                                                                                                                               | 446                                   | 34                                | 2.00 (1.05-3.80)              |
| DDD=Defined Daily Dose per day as average dose during the use.                                                                                                                                                                                                                                                                               |                                       |                                   |                               |
| <sup>a)</sup> Users were censored when they switched or started concomitant use of two or more benzodiazepines and related drugs, in addition to >90 days hospitalization/institutionalization, death, discontinuation of use, outcome of interest (pneumonia), or the end of study follow-up (December 31, 2012), whichever occurred first. |                                       |                                   |                               |
